# Supplementary material for: ERRATUM FOR \ASCENT OF FINITE COHEN-MACAULAY TYPE"
Source: MDPI journal article supplement (doi:10.3390/md21060331), 2006-01-01
Supplement: s1 [file s1]

## Supplementary materials

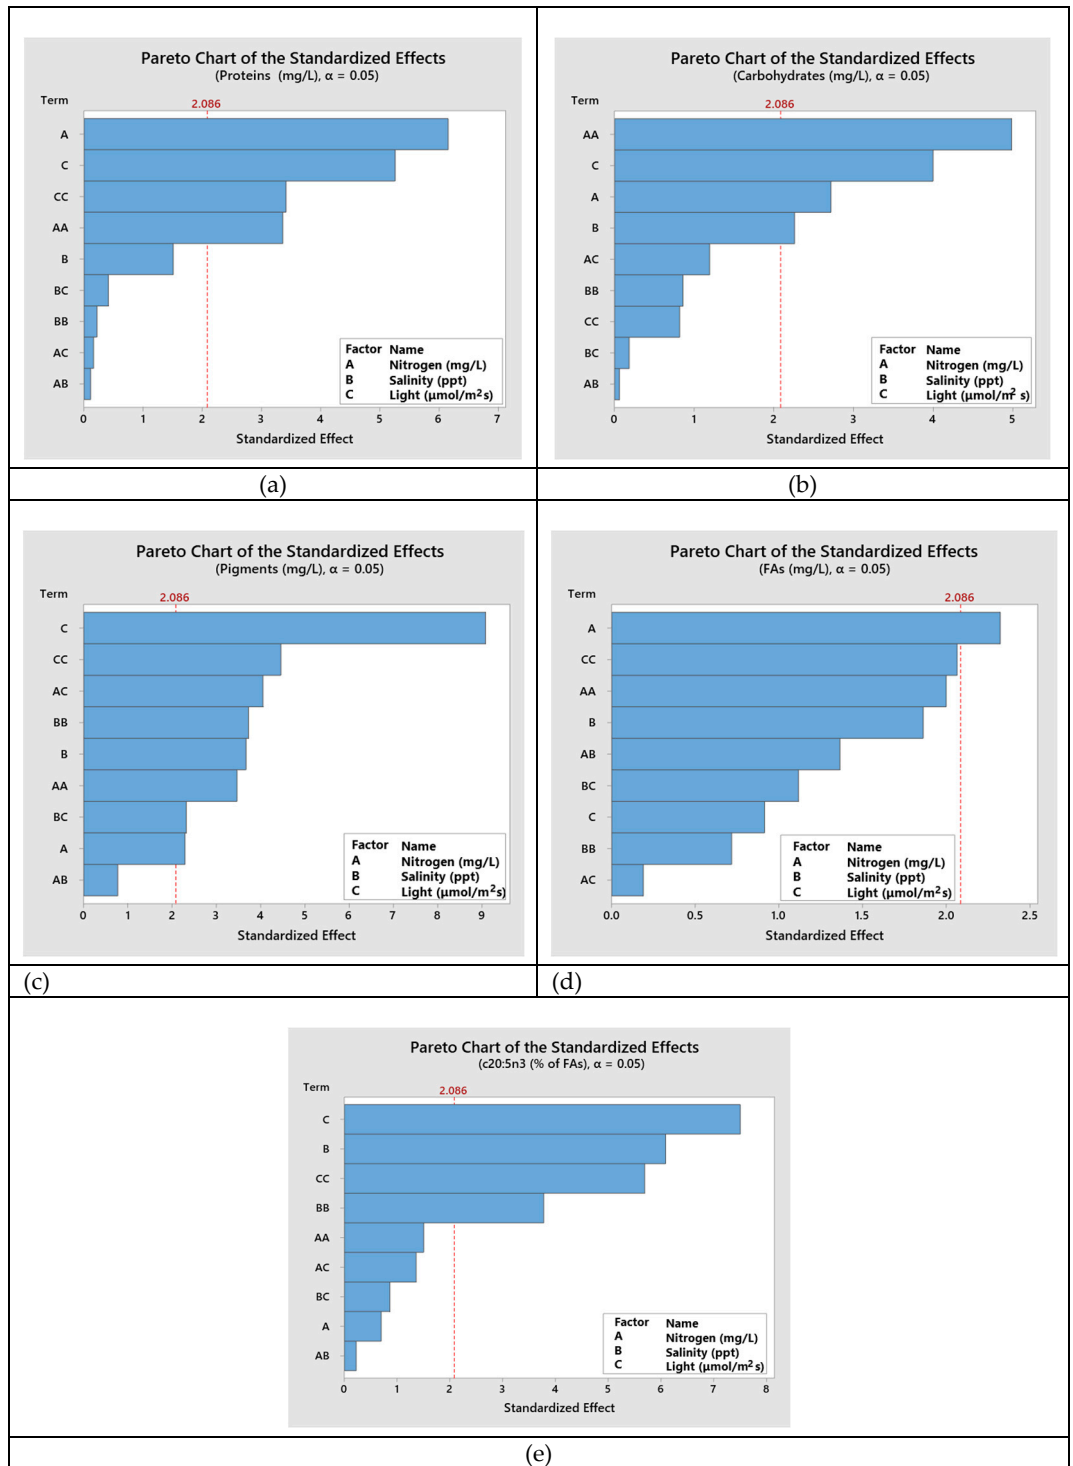

**Figure S1.** Pareto charts for the statistical significance of the nitrogen concentration, salinity level and illuminance, regarding the derived equations for (a) proteins, (b) carbohydrates, (c) pigments, (d) fatty acids and (e) EPA production.
